# Supplementary material for: Poor glycaemic control is associated with increased risk of neurodevelopmental disorders in childhood-onset type 1 diabetes: a population-based cohort study
Source: PubMed Central journal article supplement (PMC7940269; doi:10.1007/s00125-020-05372-5), 2021-01-16
Supplement: 125_2020_5372_MOESM1_ESM.pdf [file 125_2020_5372_MOESM1_ESM.pdf]

**ESM Table 1.** Descriptions of used Swedish registers.

| <b>Register, coverage period</b>                                                        | <b>Summary of available information</b>                                                                                                                                                                                                                                                                                                                                                                                              |
|-----------------------------------------------------------------------------------------|--------------------------------------------------------------------------------------------------------------------------------------------------------------------------------------------------------------------------------------------------------------------------------------------------------------------------------------------------------------------------------------------------------------------------------------|
| National Diabetes Register, 1996-                                                       | The Swedish Diabetes Registry was started from 1996 and it defines type 1 diabetes as receiving insulin treatment and diagnosis before or at age 30, which has been validated in 97% of cases (1).                                                                                                                                                                                                                                   |
| SWEDIABKIDS Database, 2000-                                                             | The Swediabkids database was established in 2000 and collected information for more than 95% of Swedish children and adolescents with type 1 diabetes, which contains outpatient records from all paediatric diabetes centres in Sweden. Since 2007 the registry has included data on almost all (98%) children and adolescents with diabetes in Sweden, and since 2008 information on severe hypoglycaemia is recorded (2).         |
| National Patient Register (NPR), 1964-                                                  | Data on inpatient (nationwide coverage since 1987) and outpatient specialist health care facilities (since 2001). Diagnoses, coded using the International Classification of Diseases (ICD 7-10), and are given by a consultant physician at the time of discharge. The validity of many diagnoses has been evaluated and found to be 95-100% (3).                                                                                   |
| Clinical Database for Child and Adolescent Psychiatry in Stockholm (PASTILL), 2001-     | Data from child and adolescent psychiatric in- and outpatient care within Stockholm County with 96% validity proved for neurodevelopmental disorders (4).                                                                                                                                                                                                                                                                            |
| Habilitation Register (HAB), 1997-                                                      | Data on use of Stockholm County Habilitation Services due to disability (intellectual disability, autism spectrum disorders, motor, vision and hearing impairment) (4).                                                                                                                                                                                                                                                              |
| The Halmstad University Register on Pupils with Intellectual Disability (HURPID), 2001- | School education is compulsory for all children between the ages of 7 and 16 residing in Sweden; children with intellectual disability who are not be able to fulfil the learning goals in the ordinary school are entitled to a special type of school that is physically integrated with the regular educational system. The data from HURPID comes from such upper secondary schools for pupils with intellectual disability (5). |
| Multi-Generation Register (MGR), 1932-                                                  | Swedish residents linked to their parents. Enables identification of relatives and construction of extended family structure.                                                                                                                                                                                                                                                                                                        |
| Total Population Register, 1961-                                                        | Marital status, Citizenships, immigration and emigration (6).                                                                                                                                                                                                                                                                                                                                                                        |
| Cause of Death Register, 1952-                                                          | Primary and contributory causes of death and date of death (7).                                                                                                                                                                                                                                                                                                                                                                      |
| Migration Register, 1961-                                                               | Information on the date of emigration events (6).                                                                                                                                                                                                                                                                                                                                                                                    |
| Education Register, 1985-                                                               | Established in 1985, consists of data from educational institutions in Sweden updated once a year. 31 Earlier registers of the population's level of education had been produced in the 1960 and 1970 censuses (8).                                                                                                                                                                                                                  |
| Integrated Database for Labor and Market Research (LISA), 1990-                         | Annual information on education level, personal and family income, unemployment status, and                                                                                                                                                                                                                                                                                                                                          |

|  |                                                                                  |
|--|----------------------------------------------------------------------------------|
|  | social welfare benefits since 1990 for all individuals from 16 years of age (9). |
|--|----------------------------------------------------------------------------------|

**ESM Table 2.** ICD codes used to define psychiatric disorders in the patients and their parents.

|                                                                                | <b>ICD-8</b>                                                                    | <b>ICD-9</b>                                                                    | <b>ICD-10</b>                                                                   |
|--------------------------------------------------------------------------------|---------------------------------------------------------------------------------|---------------------------------------------------------------------------------|---------------------------------------------------------------------------------|
|                                                                                | <b>(1969-1986)</b>                                                              | <b>(1987-1996)</b>                                                              | <b>(1997-)</b>                                                                  |
| <b>Diagnoses of study outcomes</b>                                             |                                                                                 |                                                                                 |                                                                                 |
| <b>Primary outcomes:</b>                                                       |                                                                                 |                                                                                 |                                                                                 |
| Any Neurodevelopmental Disorders                                               | Any code from specific categories of psychiatric disorders                      | Any code from specific categories of psychiatric disorders                      | Any code from specific categories of psychiatric disorders                      |
| <b>Secondary outcomes, specific categories of neurodevelopmental disorders</b> |                                                                                 |                                                                                 |                                                                                 |
| Attention deficit/hyperactivity disorders                                      | -                                                                               | 314                                                                             | F90                                                                             |
| Autism spectrum disorder                                                       | -                                                                               | 299                                                                             | F84                                                                             |
| Intellectual disability                                                        | 310-315                                                                         | 317-319                                                                         | F70-F79                                                                         |
| <b>Psychiatric diagnoses for adjustment</b>                                    |                                                                                 |                                                                                 |                                                                                 |
| <b>Any psychiatric disorders</b>                                               | Any code from other psychiatric disorders plus any neurodevelopmental disorders | Any code from other psychiatric disorders plus any neurodevelopmental disorders | Any code from other psychiatric disorders plus any neurodevelopmental disorders |
| <b>Other psychiatric disorders</b>                                             | Any code from specific categories of psychiatric disorders                      | Any code from specific categories of psychiatric disorders                      | Any code from specific categories of psychiatric disorders                      |
| <b>Specific categories of psychiatric disorders:</b>                           |                                                                                 |                                                                                 |                                                                                 |
| Psychotic disorders                                                            | 295, 297-299                                                                    | 295, 297, 298                                                                   | F20-F29                                                                         |
| Mood disorders                                                                 | 296, 300.40                                                                     | 296, 300E, 311                                                                  | F30-F39                                                                         |
| Anxiety disorders                                                              | 300.00-300.30,300.50-300.99, 307                                                | 300, 300A-300D, 300F-300X, 308-309                                              | F40-F45, F48                                                                    |
| Eating disorders                                                               | -                                                                               | 307B, 307F                                                                      | F50                                                                             |
| Substance misuse                                                               | 291, 303, 304                                                                   | 291, 303, 304, 305A, 305X                                                       | F10-F19                                                                         |

|                       |     |     |              |
|-----------------------|-----|-----|--------------|
| Behavioral disorders  | -   | -   | F91          |
| Personality disorders | 301 | 301 | F60-F62, F69 |

ICD: International Statistical Classification of Disease and Related Health Problems.

**ESM Table 3.** Hazard ratios (HR) with 95% confidence intervals (95%CI) for neurodevelopmental disorders among patients with childhood-onset type 1 diabetes diagnosed after 2008, according to time-varying HbA<sub>1c</sub> levels.

| Variable                                | Time-varying HbA <sub>1c</sub> levels |                              |                         | HbA <sub>1c</sub> 1%<br>(10<br>mmol/mol)<br>change |
|-----------------------------------------|---------------------------------------|------------------------------|-------------------------|----------------------------------------------------|
|                                         | <7.5% (<58<br>mmol/mol)               | 7.5,8.6% (58,70<br>mmol/mol) | >8.6% (>70<br>mmol/mol) |                                                    |
| <b>Any neurodevelopmental disorders</b> |                                       |                              |                         |                                                    |
| Model 1 <sup>a</sup>                    | 1 (reference)                         | 1.44 (0.94,2.18)             | 4.22 (2.78,6.42)        | 1.45<br>(1.31,1.61)                                |
| Model 2 <sup>b</sup>                    | 1 (reference)                         | 1.64 (1.03,2.61)             | 4.77 (2.89,7.67)        | 1.55 (1.38,<br>1.74)                               |
| Model 3 <sup>c</sup>                    | 1 (reference)                         | 1.46 (0.90,2.36)             | 4.13 (2.59,6.59)        | 1.51<br>(1.35,1.69)                                |
| <b>ADHD</b>                             |                                       |                              |                         |                                                    |
| Model 1                                 | 1 (reference)                         | 1.46 (0.90,2.37)             | 4.18 (2.59,6.77)        | 1.45<br>(1.30,1.61)                                |
| Model 2                                 | 1 (reference)                         | 1.64 (0.95,<br>2.83)         | 4.98 (2.85,8.70)        | 1.60<br>(1.43,1.80)                                |
| Model 3                                 | 1 (reference)                         | 1.37 (0.78,2.40)             | 3.97 (2.31,6.83)        | 1.54<br>(1.35,1.75)                                |
| <b>ASD</b>                              |                                       |                              |                         |                                                    |
| Model 1                                 | 1 (reference)                         | 1.63 (0.69,3.84)             | 2.17 (0.76,6.18)        | 1.18<br>(0.90,1.54)                                |
| Model 2                                 | 1 (reference)                         | 1.87 (0.72,4.84)             | 2.72 (0.79,9.41)        | 1.21<br>(0.88,1.67)                                |
| Model 3                                 | 1 (reference)                         | 2.22 (0.87,5.67)             | 2.64 (0.89,7.82)        | 1.25<br>(0.92,1.70)                                |
| <b>Intellectual disability</b>          |                                       |                              |                         |                                                    |
| Model 1                                 | 1 (reference)                         | 0.47 (0.06,3.91)             | 11.74<br>(3.16,43.62)   | 2.66<br>(1.74,4.06)                                |
| Model 2                                 | 1 (reference)                         | 0.86 (0.11,6.67)             | 13.28<br>(1.89,93.19)   | 2.96<br>(1.69,5.18)                                |
| Model 3                                 | 1 (reference)                         | 0.62 (0.07,5.45)             | 19.73<br>(3.83,101.5)   | 2.82<br>(1.78,4.46)                                |

<sup>a</sup> Model 1: stratified Cox regression on age at type 1 diabetes diagnosis and birth year, adjusted for time-updated diabetes duration.

<sup>b</sup> Model 2: additionally adjusted for sex, psychiatric morbidity prior to inclusion, parental psychiatric history and highest parental education level.

<sup>c</sup> Model 3: additionally adjusted for time-updated episodes of severe hypoglycaemia and diabetic ketoacidosis.

**ESM Table 4.** Incidence rate and hazard ratios (HR) with 95% confidence intervals (95%CI) for neurodevelopmental disorders diagnosed after 1 year of follow-up among patients with childhood-onset type 1 diabetes and matched reference individuals from general population, according to mean HbA<sub>1c</sub> levels.

| Variable                                          | Matched reference individuals | Overall type 1 diabetes | Type 1 diabetes grouped by mean HbA <sub>1c</sub> during follow-up |                           |                      |
|---------------------------------------------------|-------------------------------|-------------------------|--------------------------------------------------------------------|---------------------------|----------------------|
|                                                   |                               |                         | <7.5% (<58 mmol/mol)                                               | 7.5,8.6% (58,70 mmol/mol) | >8.6% (>70 mmol/mol) |
| <b>Any neurodevelopmental disorders</b>           |                               |                         |                                                                    |                           |                      |
| Number of outcomes /person-years                  | 3,060/500,599                 | 385/50,050              | 115/16,888                                                         | 179/24,487                | 91/8,676             |
| Incidence rate/per 1000 person-years <sup>a</sup> | 6.11                          | 7.69                    | 6.81                                                               | 7.31                      | 10.49                |
| Crude model <sup>b</sup>                          | 1 (reference)                 | 1.25 (1.13,1.39)        | 1.04 (0.86,1.26)                                                   | 1.19 (1.02,1.39)          | 1.95 (1.56,2.45)     |
| Adjusted model <sup>c</sup>                       | 1 (reference)                 | 1.27 (1.14,1.41)        | 1.11 (0.91,1.35)                                                   | 1.21 (1.03,1.42)          | 1.75 (1.39,2.21)     |
| <b>ADHD</b>                                       |                               |                         |                                                                    |                           |                      |
| Number of outcomes /person-years                  | 2,309/500,599                 | 289/50,050              | 75/16,888                                                          | 141/24,487                | 73/8,676             |
| Incidence rate/per 1000 person-years              | 4.61                          | 5.77                    | 4.44                                                               | 5.75                      | 8.41                 |
| Crude model                                       | 1 (reference)                 | 1.25 (1.10,1.41)        | 0.90 (0.71,1.14)                                                   | 1.24 (1.04,1.48)          | 2.11 (1.64,2.72)     |
| Adjusted model                                    | 1 (reference)                 | 1.25 (1.11,1.42)        | 0.96 (0.76,1.22)                                                   | 1.26 (1.05,1.50)          | 1.84 (1.42,2.39)     |
| <b>ASD</b>                                        |                               |                         |                                                                    |                           |                      |
| Number of outcomes /person-years                  | 652/500,599                   | 81/50,050               | 37/16,888                                                          | 32/24,487                 | 12/8,676             |
| Incidence rate/per 1000 person-years              | 1.30                          | 1.62                    | 2.19                                                               | 1.31                      | 1.38                 |
| Crude model                                       | 1 (reference)                 | 1.23 (0.98,1.56)        | 1.38 (0.98,1.94)                                                   | 1.07 (0.74,1.54)          | 1.36 (0.74,2.49)     |
| Adjusted model                                    | 1 (reference)                 | 1.26 (1.00,1.59)        | 1.45 (1.03,2.06)                                                   | 1.07 (0.74,1.54)          | 1.36 (0.74,2.52)     |
| <b>Intellectual disability</b>                    |                               |                         |                                                                    |                           |                      |
| Number of outcomes /person-years                  | 307/500,599                   | 38/50,050               | 10/16,888                                                          | 19/24,487                 | 9/8,676              |
| Incidence rate/per 1000 person-years              | 0.61                          | 0.76                    | 0.59                                                               | 0.78                      | 1.04                 |
| Crude model                                       | 1 (reference)                 | 1.22 (0.87,1.71)        | 1.02 (0.53,1.95)                                                   | 1.20 (0.75,1.94)          | 1.66 (0.82,3.36)     |

|                       |               |                  |                     |                     |                     |
|-----------------------|---------------|------------------|---------------------|---------------------|---------------------|
| <b>Adjusted model</b> | 1 (reference) | 1.28 (0.90,1.81) | 1.12<br>(0.58,2.18) | 1.31<br>(0.80,2.14) | 1.42<br>(0.69,2.95) |
|-----------------------|---------------|------------------|---------------------|---------------------|---------------------|

<sup>a</sup> Number of outcomes per 1000 person-years.

<sup>b</sup> Crude Model: stratified Cox regression, each matched group as stratum.

<sup>c</sup> Adjusted Model: additionally adjusted for psychiatric morbidity prior to inclusion, parental psychiatric history and highest parental education level.

**ESM Table 5.** Hazard ratios (HR) with 95% confidence intervals (95%CI) for neurodevelopmental disorders diagnosed after 1 year of follow-up among patients with childhood-onset type 1 diabetes, according to time-varying HbA<sub>1c</sub> levels.

| Variable                         | Time-varying HbA <sub>1c</sub> levels |                              |                         | HbA <sub>1c</sub> 1%<br>(10<br>mmol/mol)<br>change |
|----------------------------------|---------------------------------------|------------------------------|-------------------------|----------------------------------------------------|
|                                  | <7.5% (<58<br>mmol/mol)               | 7.5,8.6% (58,70<br>mmol/mol) | >8.6% (>70<br>mmol/mol) |                                                    |
| Any neurodevelopmental disorders |                                       |                              |                         |                                                    |
| Model 1 <sup>a</sup>             | 1 (reference)                         | 1.56 (1.18,2.06)             | 3.64 (2.76,4.81)        | 1.37<br>(1.29,1.46)                                |
| Model 2 <sup>b</sup>             | 1 (reference)                         | 1.62 (1.20,2.19)             | 3.70 (2.74,5.00)        | 1.38<br>(1.29,1.47)                                |
| ADHD                             |                                       |                              |                         |                                                    |
| Model 1                          | 1 (reference)                         | 1.65 (1.19,2.29)             | 4.18 (3.02,5.78)        | 1.44<br>(1.34,1.53)                                |
| Model 2                          | 1 (reference)                         | 1.68 (1.19,2.42)             | 4.14 (2.90,5.90)        | 1.44<br>(1.35,1.55)                                |
| ASD                              |                                       |                              |                         |                                                    |
| Model 1                          | 1 (reference)                         | 1.43 (0.82,2.51)             | 2.40 (1.35,4.26)        | 1.10<br>(0.93,1.29)                                |
| Model 2                          | 1 (reference)                         | 1.57 (0.86,2.90)             | 2.84 (1.52,5.28)        | 1.14<br>(0.97,1.35)                                |
| Intellectual disability          |                                       |                              |                         |                                                    |
| Model 1                          | 1 (reference)                         | 1.59 (0.68,3.73)             | 3.44 (1.44,8.24)        | 1.35<br>(1.07,1.70)                                |
| Model 2                          | 1 (reference)                         | 1.95 (0.67,5.64)             | 3.93<br>(1.38,11.22)    | 1.41<br>(1.11,1.79)                                |

<sup>a</sup> Model 1: stratified Cox regression on age at type 1 diabetes diagnosis and birth year, adjusted for time-updated diabetes duration.

<sup>b</sup> Model 2: additionally adjusted for sex, psychiatric morbidity prior to inclusion, parental psychiatric history and highest parental education level.



**ESM Table 6.** Incidence rate and hazard ratios (HR) with 95% confidence intervals (95%CI) for neurodevelopmental disorders among patients with childhood-onset type 1 diabetes (first HbA<sub>1c</sub> documented within 3 month after diagnosis) compared with matched reference individuals from general population, according to mean HbA<sub>1c</sub> levels.

| Variable                                          | Matched reference individuals | Overall type 1 diabetes | Type 1 diabetes grouped by mean HbA <sub>1c</sub> during follow-up |                           |                      |
|---------------------------------------------------|-------------------------------|-------------------------|--------------------------------------------------------------------|---------------------------|----------------------|
|                                                   |                               |                         | <7.5% (<58 mmol/mol)                                               | 7.5,8.6% (58,70 mmol/mol) | >8.6% (>70 mmol/mol) |
| <b>Any neurodevelopmental disorders</b>           |                               |                         |                                                                    |                           |                      |
| Number of outcomes /person-years                  | 2,278/364,303                 | 288/36,392              | 94/12,930                                                          | 133/17,651                | 61/5,811             |
| Incidence rate/per 1000 person-years <sup>a</sup> | 6.25                          | 7.91                    | 7.27                                                               | 7.54                      | 10.50                |
| Crude model <sup>b</sup>                          | 1 (reference)                 | 1.26 (1.12,1.43)        | 1.08 (0.87,1.33)                                                   | 1.21 (1.01,1.45)          | 1.96 (1.49,2.58)     |
| Adjusted model <sup>c</sup>                       | 1 (reference)                 | 1.29 (1.14,1.46)        | 1.16 (0.93,1.44)                                                   | 1.25 (1.04,1.50)          | 1.75 (1.32,2.33)     |
| <b>ADHD</b>                                       |                               |                         |                                                                    |                           |                      |
| Number of outcomes /person-years                  | 1,694/364,303                 | 219/36,392              | 62/12,930                                                          | 105/17,651                | 52/5,811             |
| Incidence rate/per 1000 person-years              | 4.65                          | 6.02                    | 4.80                                                               | 5.95                      | 9.95                 |
| Crude model                                       | 1 (reference)                 | 1.29 (1.12,1.49)        | 0.95 (0.73,1.24)                                                   | 1.29 (1.05,1.58)          | 2.29 (1.70,3.10)     |
| Adjusted model                                    | 1 (reference)                 | 1.32 (1.14,1.53)        | 1.02 (0.78,1.33)                                                   | 1.34 (1.09,1.65)          | 2.00 (1.46,2.73)     |
| <b>ASD</b>                                        |                               |                         |                                                                    |                           |                      |
| Number of outcomes /person-years                  | 510/364,303                   | 62/36,392               | 30/12,930                                                          | 24/17,651                 | 8/5,811              |
| Incidence rate/per 1000 person-years              | 1.40                          | 1.70                    | 2.32                                                               | 1.36                      | 1.89                 |
| Crude model                                       | 1 (reference)                 | 1.21 (0.93,1.58)        | 1.38 (0.94,2.02)                                                   | 1.04 (0.68,1.58)          | 1.26 (0.60,2.64)     |
| Adjusted model                                    | 1 (reference)                 | 1.24 (0.95,1.62)        | 1.47 (0.99,2.16)                                                   | 1.02 (0.67,1.57)          | 1.28 (0.60,2.71)     |
| <b>Intellectual disability</b>                    |                               |                         |                                                                    |                           |                      |
| Number of outcomes /person-years                  | 230/364,303                   | 24/36,392               | 7/12,930                                                           | 13/17,651                 | 4/5,811              |
| Incidence rate/per 1000 person-years              | 0.63                          | 0.66                    | 0.54                                                               | 0.74                      | 0.69                 |
| Crude model                                       | 1 (reference)                 | 1.04 (0.68,1.58)        | 0.94 (0.43,2.04)                                                   | 1.09 (0.61,1.93)          | 1.06 (0.38,2.98)     |

|                       |               |                  |                     |                     |                     |
|-----------------------|---------------|------------------|---------------------|---------------------|---------------------|
| <b>Adjusted model</b> | 1 (reference) | 1.06 (0.69,1.63) | 1.00<br>(0.45,2.20) | 1.16<br>(0.64,2.09) | 0.91<br>(0.32,2.59) |
|-----------------------|---------------|------------------|---------------------|---------------------|---------------------|

<sup>a</sup> Number of outcomes per 1000 person-years.

<sup>b</sup> Crude Model: stratified Cox regression, each matched group as stratum, adjusted for time-updated diabetes duration.

<sup>c</sup> Adjusted Model: additionally adjusted for psychiatric morbidity prior to inclusion, parental psychiatric history and highest parental education level.

**ESM Table 7.** Hazard ratios (HR) with 95% confidence intervals (95%CI) for Neurodevelopmental Disorders among Patients with Childhood-onset Type 1 Diabetes (first HbA<sub>1c</sub> documented within 3 month after diagnosis), according to time-varying HbA<sub>1c</sub> levels.

| Variable                         | Time-varying HbA <sub>1c</sub> levels |                              |                         | HbA <sub>1c</sub> 1%<br>(10<br>mmol/mol)<br>change |
|----------------------------------|---------------------------------------|------------------------------|-------------------------|----------------------------------------------------|
|                                  | <7.5% (<58<br>mmol/mol)               | 7.5,8.6% (58,70<br>mmol/mol) | >8.6% (>70<br>mmol/mol) |                                                    |
| Any neurodevelopmental disorders |                                       |                              |                         |                                                    |
| Model 1 <sup>a</sup>             | 1 (reference)                         | 1.54 (1.13,2.09)             | 3.29 (2.40,4.51)        | 1.33<br>(1.24,1.44)                                |
| Model 2 <sup>b</sup>             | 1 (reference)                         | 1.67 (1.20,2.33)             | 3.32 (2.33,4.74)        | 1.34<br>(1.23,1.46)                                |
| ADHD                             |                                       |                              |                         |                                                    |
| Model 1                          | 1 (reference)                         | 1.52 (1.06,2.19)             | 3.75 (2.60,5.40)        | 1.40<br>(1.30,1.51)                                |
| Model 2                          | 1 (reference)                         | 1.57 (1.06,2.32)             | 3.58 (2.37,5.40)        | 1.40<br>(1.28,1.54)                                |
| ASD                              |                                       |                              |                         |                                                    |
| Model 1                          | 1 (reference)                         | 1.43 (0.80,2.55)             | 2.12 (1.09,4.12)        | 1.07<br>(0.88,1.30)                                |
| Model 2                          | 1 (reference)                         | 1.72 (0.89,3.33)             | 2.69 (1.26,5.71)        | 1.10<br>(0.90,1.36)                                |
| Intellectual disability          |                                       |                              |                         |                                                    |
| Model 1                          | 1 (reference)                         | 2.30 (0.88,6.05)             | 2.70 (0.87,8.32)        | 1.28<br>(0.90,1.83)                                |
| Model 2                          | 1 (reference)                         | 4.50<br>(1.09,18.61)         | 3.39<br>(0.78,14.76)    | 1.27<br>(0.85,1.88)                                |

<sup>a</sup> Model 1: stratified Cox regression on age at type 1 diabetes diagnosis and birth year, adjusted for time-updated diabetes duration.

<sup>b</sup> Model 2: additionally adjusted for sex, psychiatric morbidity prior to inclusion, parental psychiatric history and highest parental education level.

**ESM Table 8.** Incidence rate and hazard ratios (HRs) with 95% confidence interval (CI) for neurodevelopmental disorders among patients with childhood-onset type 1 diabetes compared with matched reference individuals from the general population, according to mean HbA<sub>1c</sub> levels categorized according to International Society for Paediatric and Adolescent Diabetes cut-offs.

| Variable                                          | Matched reference individuals | Overall type 1 diabetes | Type 1 diabetes grouped by mean HbA <sub>1c</sub> during follow-up |                           |                      |
|---------------------------------------------------|-------------------------------|-------------------------|--------------------------------------------------------------------|---------------------------|----------------------|
|                                                   |                               |                         | <7.5% (<58 mmol/mol)                                               | 7.5,8.6% (58,70 mmol/mol) | >8.6% (>70 mmol/mol) |
| <b>Any neurodevelopmental disorders</b>           |                               |                         |                                                                    |                           |                      |
| Number of outcomes /person-years                  | 3,066/501,314                 | 398/50,051              | 59/7,912                                                           | 241/33,463                | 98/8,675             |
| Incidence rate/per 1000 person-years <sup>a</sup> | 6.12                          | 7.95                    | 7.46                                                               | 7.20                      | 11.30                |
| Crude model <sup>b</sup>                          | 1 (reference)                 | 1.29 (1.17,1.44)        | 1.08 (0.83,1.41)                                                   | 1.17 (1.02,1.34)          | 2.10 (1.69,2.62)     |
| Adjusted model <sup>c</sup>                       | 1 (reference)                 | 1.31 (1.18,1.46)        | 1.14 (0.87,1.50)                                                   | 1.21 (1.05,1.38)          | 1.90 (1.51,2.37)     |
| <b>ADHD</b>                                       |                               |                         |                                                                    |                           |                      |
| Number of outcomes /person-years                  | 2,313/501,314                 | 297/50,051              | 39/7,912                                                           | 180/33,463                | 78/8,676             |
| Incidence rate/per 1000 person-years              | 4.61                          | 5.93                    | 4.93                                                               | 5.38                      | 8.99                 |
| Crude model                                       | 1 (reference)                 | 1.28 (1.14,1.45)        | 0.97 (0.69,1.34)                                                   | 1.15 (0.98,1.34)          | 2.25 (1.76,2.88)     |
| Adjusted model                                    | 1 (reference)                 | 1.29 (1.14,1.46)        | 1.02 (0.73,1.42)                                                   | 1.18 (1.01,1.38)          | 1.98 (1.53,2.55)     |
| <b>ASD</b>                                        |                               |                         |                                                                    |                           |                      |
| Number of outcomes /person-years                  | 654/501,314                   | 84/50,051               | 20/7,912                                                           | 51/33,463                 | 13/8,676             |
| Incidence rate/per 1000 person-years              | 1.30                          | 1.68                    | 2.53                                                               | 1.52                      | 1.50                 |
| Crude model                                       | 1 (reference)                 | 1.28 (1.02,1.61)        | 1.49 (0.93,2.39)                                                   | 1.18 (0.88,1.57)          | 1.47 (0.82,2.64)     |
| Adjusted model                                    | 1 (reference)                 | 1.31 (1.04,1.65)        | 1.57 (0.97,2.52)                                                   | 1.20 (0.89,1.61)          | 1.48 (0.82,2.68)     |
| <b>Intellectual disability</b>                    |                               |                         |                                                                    |                           |                      |
| Number of outcomes /person-years                  | 307/501,314                   | 40/50,051               | 4/7,912                                                            | 26/33,463                 | 10/8,675             |
| Incidence rate/per 1000 person-years              | 0.61                          | 0.80                    | 0.51                                                               | 0.78                      | 1.15                 |
| Crude model                                       | 1 (reference)                 | 1.29 (0.93,1.79)        | 0.77 (0.28,2.14)                                                   | 1.27 (0.84,1.91)          | 1.84 (0.94,6.63)     |

|                       |               |                  |                     |                     |                     |
|-----------------------|---------------|------------------|---------------------|---------------------|---------------------|
| <b>Adjusted model</b> | 1 (reference) | 1.35 (0.96,1.90) | 0.75<br>(0.27,2.10) | 1.45<br>(0.95,2.20) | 1.61<br>(0.80,3.23) |
|-----------------------|---------------|------------------|---------------------|---------------------|---------------------|

<sup>a</sup> Number of outcomes per 1000 person-years.

<sup>b</sup> Crude Model: stratified Cox regression, each matched group as stratum, adjusted for time-updated diabetes duration.

<sup>c</sup> Adjusted Model: additionally adjusted for psychiatric morbidity prior to inclusion, parental psychiatric history and highest parental education level.

**ESM Table 9.** Hazard ratios (HR) with 95% confidence intervals (95%CI) for neurodevelopmental disorders among patients with childhood-onset type 1 diabetes, according to time-varying HbA<sub>1c</sub> levels categorized according to International Society for Paediatric and Adolescent Diabetes cut-offs.

| Variable                         | Time-varying HbA <sub>1c</sub> levels |                              |                         | HbA <sub>1c</sub> 1%<br>(10<br>mmol/mol)<br>change |
|----------------------------------|---------------------------------------|------------------------------|-------------------------|----------------------------------------------------|
|                                  | <7.5% (<58<br>mmol/mol)               | 7.5,8.6% (58,70<br>mmol/mol) | >8.6% (>70<br>mmol/mol) |                                                    |
| Any neurodevelopmental disorders |                                       |                              |                         |                                                    |
| Model 1 <sup>a</sup>             | 1 (reference)                         | 1.23 (0.91,1.67)             | 3.34 (2.44,4.57)        | 1.37<br>(1.30,1.46)                                |
| Model 2 <sup>b</sup>             | 1 (reference)                         | 1.30 (0.92,1.84)             | 3.36 (2.35,4.80)        | 1.37<br>(1.30,1.46)                                |
| ADHD                             |                                       |                              |                         |                                                    |
| Model 1                          | 1 (reference)                         | 1.32 (0.92,1.90)             | 3.89 (2.70,5.63)        | 1.43<br>(1.34,1.53)                                |
| Model 2                          | 1 (reference)                         | 1.37 (0.91,2.07)             | 3.81 (2.50,5.81)        | 1.45<br>(1.35,1.55)                                |
| ASD                              |                                       |                              |                         |                                                    |
| Model 1                          | 1 (reference)                         | 0.76 (0.41,1.38)             | 1.60 (0.87,2.96)        | 1.11<br>(0.95,1.30)                                |
| Model 2                          | 1 (reference)                         | 0.82 (0.42,1.61)             | 1.84 (0.93,3.63)        | 1.14<br>(0.97,1.35)                                |
| Intellectual disability          |                                       |                              |                         |                                                    |
| Model 1                          | 1 (reference)                         | 1.76 (0.76,4.07)             | 3.84 (1.61,9.18)        | 1.40<br>(1.12,1.75)                                |
| Model 2                          | 1 (reference)                         | 1.95 (0.67,5.65)             | 3.93<br>(1.38,11.22)    | 1.41<br>(1.11,1.79)                                |

<sup>a</sup> Model 1: stratified Cox regression on age at type 1 diabetes diagnosis and birth year, adjusted for time-updated diabetes duration.

<sup>b</sup> Model 2: additionally adjusted for sex, psychiatric morbidity prior to inclusion, parental psychiatric history and highest parental education level.

## References

1. Eeg, Olofsson K, Cederholm J, Nilsson PM, Zethelius B, Svensson AM, Gudbjornsdottir S, Eliasson B. Glycemic control and cardiovascular disease in 7,454 patients with type 1 diabetes: an observational study from the Swedish National Diabetes Register (NDR). *Diabetes Care* 2010;33:1640,1646
2. Samuelsson U, Akesson K, Peterson A, Hanas R, Hanberger L. Continued improvement of metabolic control in Swedish pediatric diabetes care. *Pediatr Diabetes* 2018;19:150,157
3. Ludvigsson JF, Andersson E, Ekbom A, Feychting M, Kim J,L, Reuterwall C, Heurgren M, Olausson PO. External review and validation of the Swedish national inpatient register. *BMC Public Health* 2011;11:450
4. Idring S, Rai D, Dal H, Dalman C, Sturm H, Zander E, Lee BK, Serlachius E, Magnusson C. Autism spectrum disorders in the Stockholm Youth Cohort: design, prevalence and validity. *PloS one* 2012;7:e41280
5. Lundh A, Forsman M, Serlachius E, Lichtenstein P, Landen M. Outcomes of child psychiatric treatment. *Acta Psychiatr Scand* 2013;128:34,44
6. Ludvigsson JF, Almqvist C, Bonamy A,KE, Ljung R, Michaëlsson K, Neovius M, Stephansson O, Ye W. Registers of the Swedish total population and their use in medical research. *Eur J Epidemiol* 2016;31:125,136
7. Brooke HL, Talbäck M, Hörnblad J, Johansson LA, Ludvigsson JF, Druid H, Feychting M, Ljung R. The Swedish cause of death register. *Eur J Epidemiol* 2017;32:765,773
8. Sweden S. *Educational attainment of the population 2010*. Statistics Sweden: Stockholm 2011;
9. Ludvigsson JF, Svedberg P, Olén O, Bruze G, Neovius M. The longitudinal integrated database for health insurance and labour market studies (LISA) and its use in medical research. *Eur J Epidemiol* 2019;34:423,437
